# Supplementary material for: A pan-cancer analysis of Dyskeratosis congenita 1 (DKC1) as a prognostic biomarker
Source: Springer Nature journal article supplement (doi:10.1186/s41065-023-00302-y), 2023-12-11

## Supplementary Tables

Supplementary Table S1 Correlation of DKC1 DNA methylation and gene expression at 21 probes in BRCA

| Probe ID   | P value                 | Pearson R value      | Promoter Probe |
|------------|-------------------------|----------------------|----------------|
| cg15043492 | 3.2475218200787297e-25  | -0.38032257002252956 | Yes            |
| cg09055253 | 1.5539293414418218e-18  | -0.3076182233734055  | Yes            |
| cg08087512 | 5.2253128041108885e-21  | -0.33439563421910434 | Yes            |
| cg13033283 | 1.8395880942206102e-13  | -0.2515996493507603  | Yes            |
| cg09411587 | 4.966767212812491e-20   | -0.32380846152598536 | Yes            |
| cg19944582 | 5.8049098687975635e-9   | -0.19694009256288553 | Yes            |
| cg23712855 | 3.032183002628016e-16   | -0.282660879951007   | Yes            |
| cg14350469 | 5.035003632298603e-10   | -0.2106377210115036  | Yes            |
| cg17274024 | 1.6555873533542094e-19  | -0.31832447985882345 | No             |
| cg01257202 | 8.828922831869033e-16   | -0.2775544404880365  | No             |
| cg09049751 | 1.1185470063292233e-7   | 0.17931981833450036  | No             |
| cg16531342 | 0.000006026522490192134 | 0.15295357929783726  | No             |
| cg27505756 | 0.01817943365920727     | 0.08011009103555952  | No             |
| cg03028851 | 0.0021058743084094098   | 0.10417416549293944  | No             |
| cg13617521 | 4.322304603603714e-9    | 0.1986289185160424   | No             |
| cg19023236 | 0.0009464613415447451   | 0.11195742847484769  | No             |
| cg27221747 | 0.009546019690349005    | 0.0878789618207002   | No             |
| cg14825312 | 0.0027286255687338844   | 0.10154135738006013  | No             |
| cg22208280 | 1.5760531235367998e-16  | 0.28577703489555994  | No             |
| cg01112702 | 0.011615777814286715    | 0.08557364494095888  | No             |
| cg22419482 | 0.00041138077602523     | 0.11958512605233133  | No             |

Supplementary Table S2 Analysis of CPTAC-identified phosphorylation sites of DKC via the PhosphoNET database.

| Site | Sequence             | PMID     | Hydropobicity | P-site Similarity Score | Maximum Kinase Specificity | Sum Kinase Specificity Score | Conservation Score |
|------|----------------------|----------|---------------|-------------------------|----------------------------|------------------------------|--------------------|
| S21  | KKKKERKS<br>LPEEDVA  | 16565220 | -2.093        | -53.6                   | 549                        | 18,583                       | 23.0               |
| Y419 | WKQEYVDY<br>SESAKKE  | NA       | -1.993        | -57.5                   | 509                        | 23,348                       | 36.4               |
| S451 | TAKRKRESE<br>SESEDET | 16083285 | -2.580        | -52.2                   | 384                        | 16,711                       | 11.2               |
| S453 | KRKRESESE<br>SDETPP  | 16083285 | -2.867        | -52.0                   | 297                        | 12,860                       | 12.7               |
| S455 | KRESESESD<br>ETPPAA  | 16083285 | -2.067        | -52.2                   | 347                        | 14,170                       | 14.2               |
| T458 | SESESEDETPP<br>AAPQL | 19366988 | -1.360        | -52.4                   | 291                        | 11,276                       | 12.4               |
| S473 | IKKEKSKK<br>KDKKAK   | NA       | -2.753        | -57.8                   | 389                        | 14,554                       | 9.1                |
| S485 | KAKAGLES<br>GAEPGDG  | 18669648 | -0.927        | -54.4                   | 301                        | 11,220                       | 18.8               |
| S494 | AEPGDGDS<br>DTTKKKK  | 15302935 | -2.213        | -56.0                   | 374                        | 13,370                       | 26.4               |
| T496 | PGDGSDST<br>TKKKKKK  | 18669648 | -2.620        | -55.2                   | 229                        | 9,005                        | 26.4               |
| S513 | AKEVELVSE            | 15302935 | -0.222        | -71.4                   | 302                        | 12,386                       | 23.7               |

## Supplementary Figure Legends

**Fig. S1 Structural characteristics of DKC1.** (A) Genomic location of human DKC1; (B) Conserved domains of DKC1 in 22 species. (C) The phylogenetic tree of DKC1 in 21 species.

**Fig. S2 Expression level of DKC1 in different tissues, cells and plasma according to consensus datasets.** (A) RNA tissue specificity of DKC1. (B) Immune cell type specificity of DKC1. (C) RNA single cell type specificity of DKC1. (D) Mass spectrometry-based plasma proteomics of DKC1

**Fig. S3 DKC1 expression in different cancers and pathological stages.** (A) box plot data for ACC, OV, SARC, TGCT, and UCS in TCGA project including normal tissues of GTEx database as controls. (B) The DKC1 total protein expression level in Clear cell RCC, Glioblastoma multiforme, Pancreatic adenocarcinoma and Hepatocellular carcinoma based on CPTAC database. (C) The main pathological stages of DKC1 expression levels in THCA, UCEC, STAD, CESE, COAD, DLBC, ESCA, HNSC, KIRC, LUAD, LUSC, PAAD, READ, BRCA, UCS, SKMC, BLAC, TGCT and CHOL based on TCGA database. \*  $P < 0.05$ ; \*\*  $P < 0.01$ ; \*\*\*  $P < 0.001$ .

**Fig S4. Analysis of DKC1 expression and survival prognosis in Liver cancer, Gastric Cancer, Lung Cancer, Ovarian Cancer and Breast Cancer.** (A) The Overall Survival, Progression Free Survival, Relapse Free Survival and Disease-Specific Survival prognosis of DKC1 for Liver Cancer based on Kaplan–Meier plotter database. (B) The First Progression, Overall Survival, and Post Progression Survival prognosis of DKC1 for Gastric Cancer based on Kaplan–Meier plotter database. (C) The First Progression, Overall Survival, and Post Progression Survival prognosis of DKC1 for Lung Cancer based on Kaplan–Meier plotter database. (D) The Overall Survival, Progression Free Survival, and Post Progression Survival prognosis of DKC1 for Ovarian Cancer based on Kaplan–Meier plotter database. (E) The Distant Metastasis Free Survival, Overall Survival, Post Progression Survival and Relapse Free Survival prognosis of DKC1 for Breast Cancer based on Kaplan–Meier plotter database.

**Fig S5. DKC1 mutant alterations in BRCA and LUAD based on TCGA.** (A) The disease-free survival, disease-specific survival, overall survival, and progression-free survival of DKC1 mutant status in BRCA cases. (B) BRCA samples with DKC1 mutation in TCGA dataset. (C) The disease-free survival, disease-specific survival, overall survival, and progression-free survival of DKC1 mutant status in LUAD cases. (D) LUAD samples with DKC1 mutation in TCGA dataset. (E) Spearman correlation of DKC1 expression data and TMB.

**Fig S6. Analysis of DKC1 DNA methylation and survival prognosis (i).** (A to K) The relevance of DKC1 DNA methylation and prognosis of BRCA with eight probes

in the non-promoter region of DKC1. (L to N) The DNA methylation level of DKC1 with multiple probes using MEXPRESS tool in the case of READ, CESC and UCEC. The probe ID, Benjamini-Hochberg-adjusted P-value, and Pearson correlation coefficients (R-value) were marked. \* P<0.05; \*\* P<0.01; \*\*\* P<0.001.

**Fig. S7 Analysis of DKC1 DNA methylation and survival prognosis (ii).** (A to E) The DNA methylation level of DKC1 with multiple probes using MEXPRESS tool in the case of LUAD, PRAD, KIRC, LGG and LAML. The probe ID, Benjamini-Hochberg-adjusted P-value, and Pearson correlation coefficients (R-value) were marked. \* P<0.05; \*\* P<0.01; \*\*\* P<0.001.

**Fig. S8 Protein phosphorylation of DKC1 in different cancers based on the CPTAC dataset.** (A) The different expression level of DKC1 in HNSC. (B) The different expression level of DKC1 in HCC. (C) The different expression level of DKC1 in LUAD.

**Fig. S9 Analysis of DKC1 expression and immune infiltration in T cell CD8<sup>+</sup> across all cancer cases in TCGA.** (A) The association between DKC1 expression level and infiltration level of T cell CD8<sup>+</sup> through ten different algorithms. (B) Correlation between DKC1 expression level and infiltration level of T cell CD8<sup>+</sup> in HNSC, HNSC-HPV-, KIRC, THYM, BRCA, BRCA-Basal, BRCA-LumB, DLBC and UVM with one specific algorithm.

**Fig. S10 The association between DKC1 expression level and infiltration level of B cell(A), Mast cell(B), Monocyte(C), Neutrophil(D), NK cell(E), T cell CD4<sup>+</sup>(F), Tregs(G) and Macrophage(H) through different algorithms.**

**Fig. S11 The KEGG pathway analysis of DKC1.**

**Fig. S12 DKC1 related gene enrichment analysis.** (A) GO enrichment analysis of DKC1-binding proteins or DKC1-related genes for keyword “cellular component”. (B) Cnetplot for GO analysis of the first five cellular components were displayed. (C) GO enrichment analysis of DKC1-binding proteins or DKC1-related genes for keyword “biological process”. (D) Cnetplot for GO analysis of the first five biological processes were displayed.

# S1

## A DKC1(ENSG00000130826 ) Chromosome X: 154,762,742-154,777,689

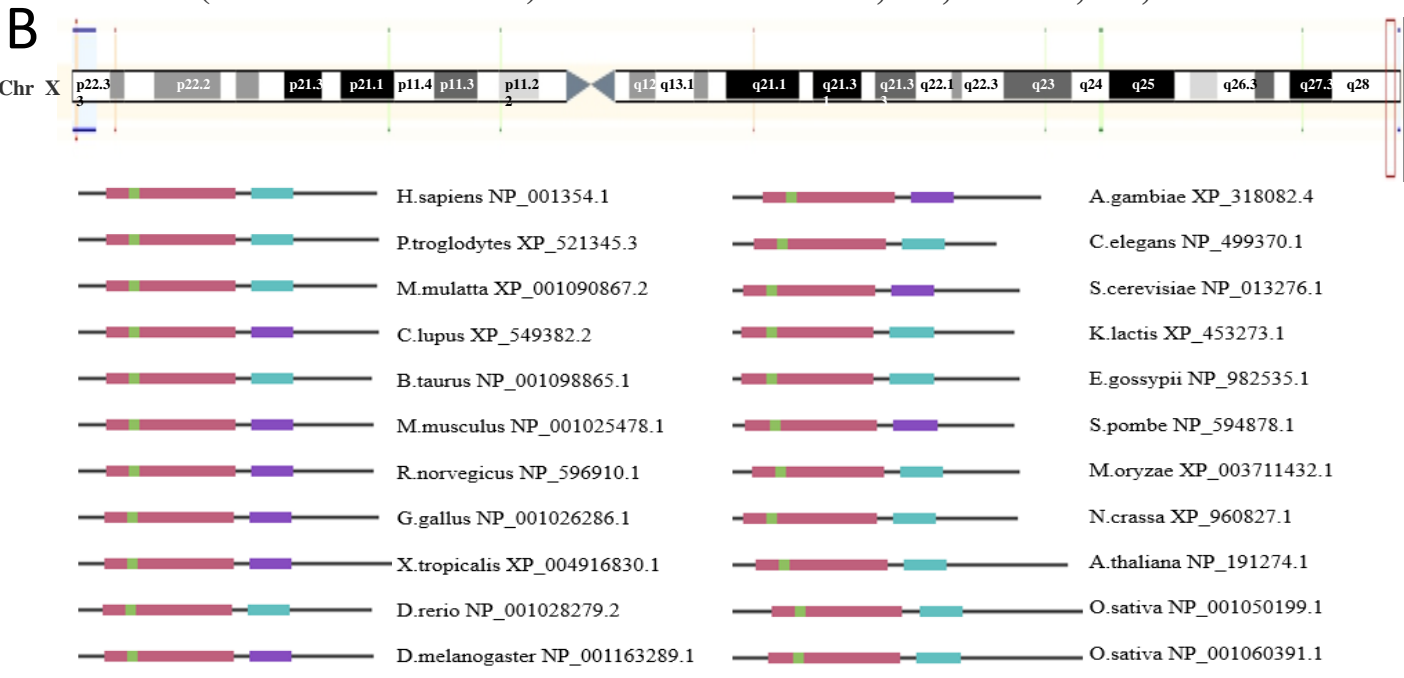

## Conserved Domains

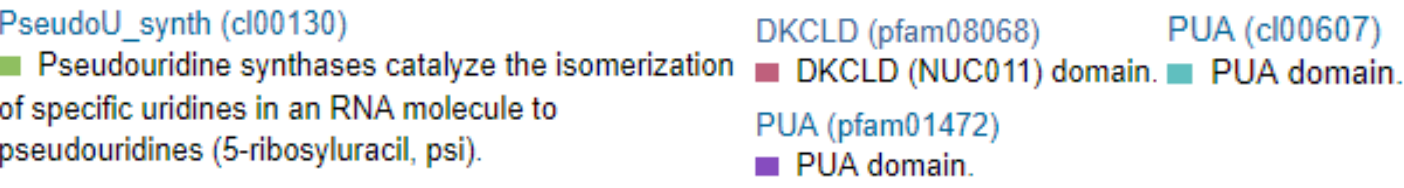

## C

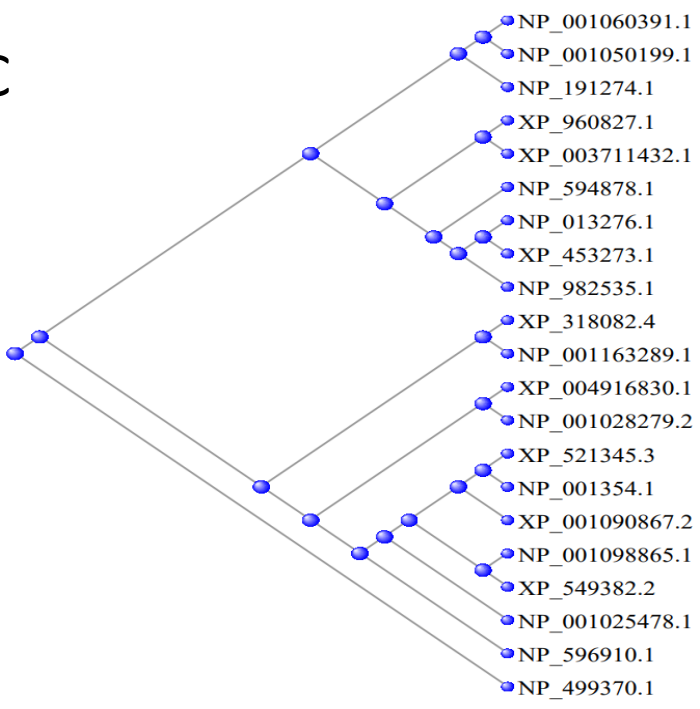



## D

### Detected in plasma by mass spectrometry

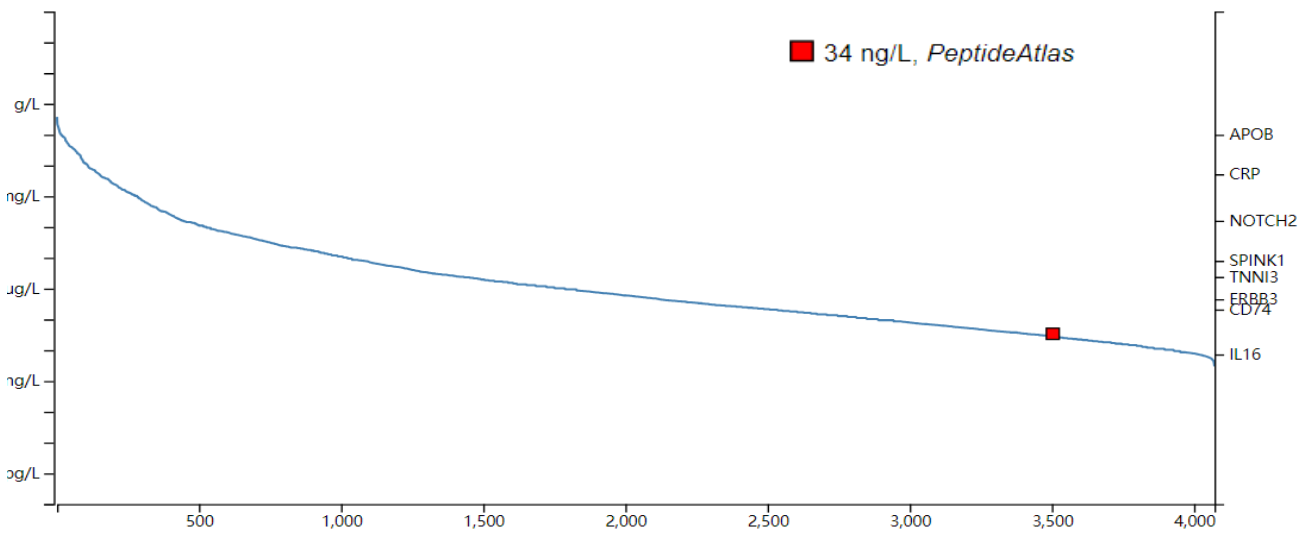

# S3

## A

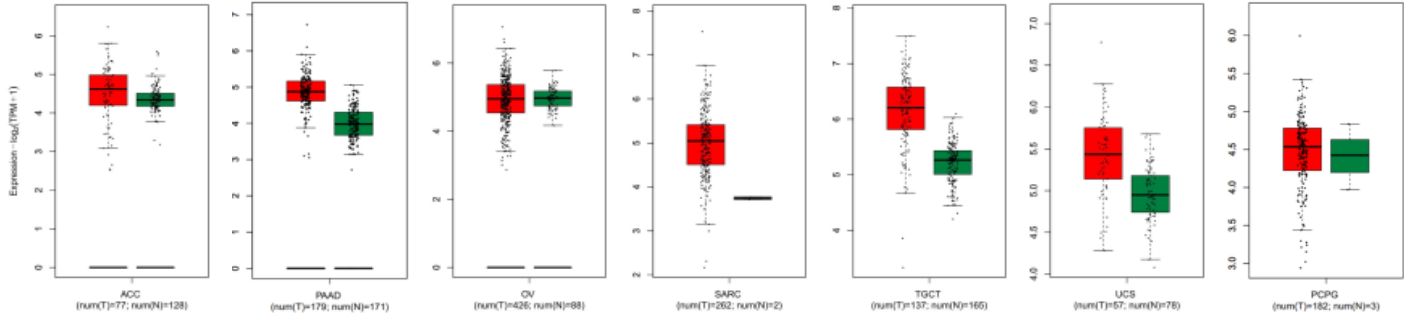

## B

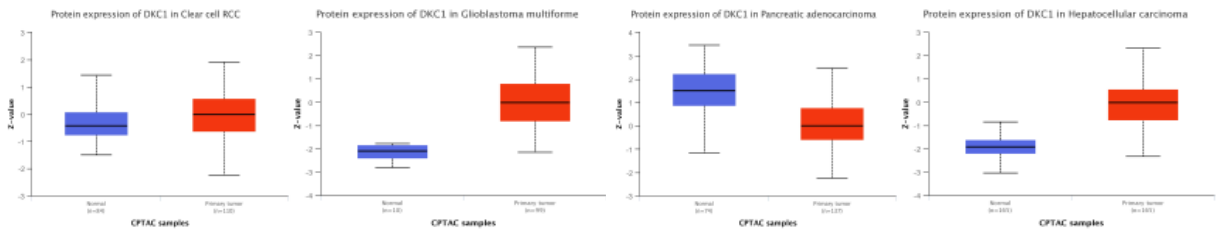

## C

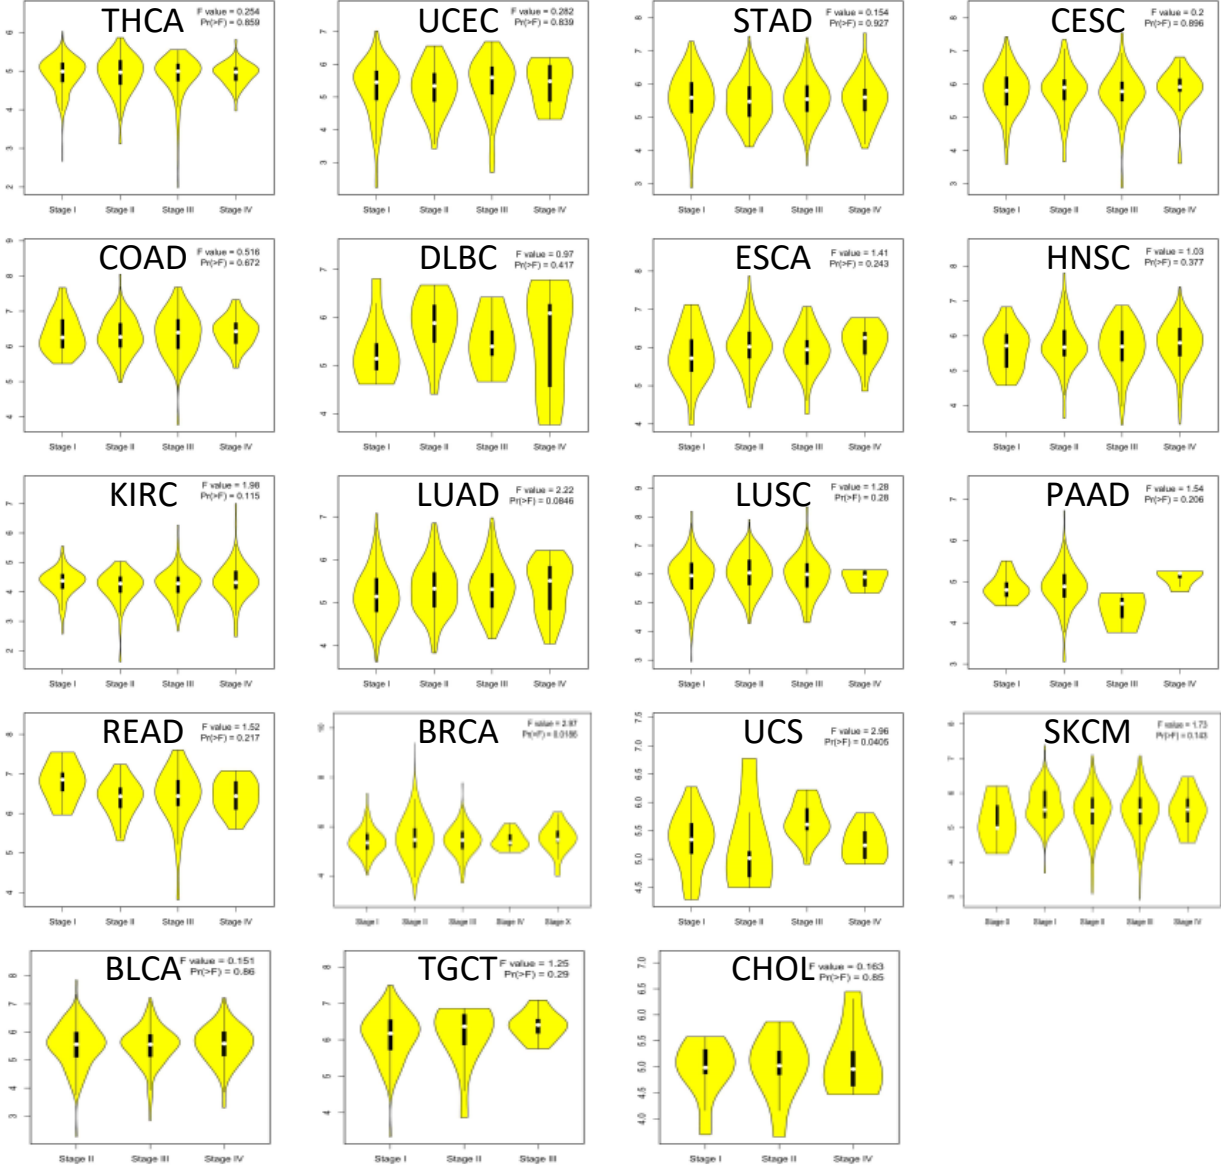

# S4

## A Liver Cancer

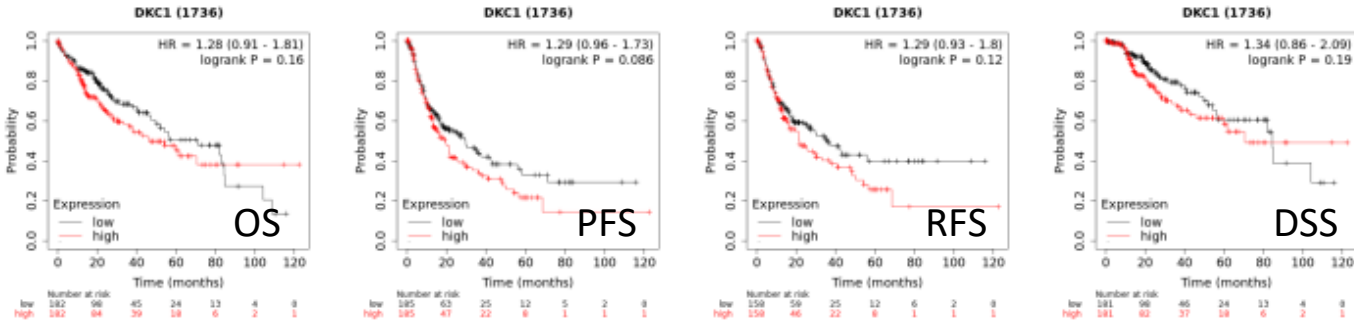

## B Gastric Cancer

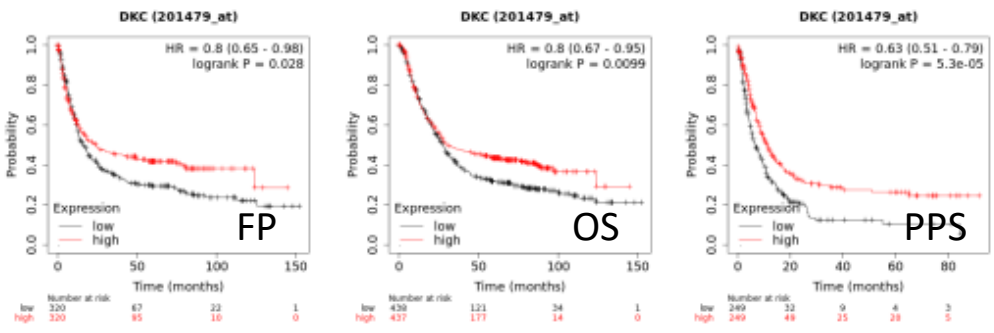

## C Lung Cancer

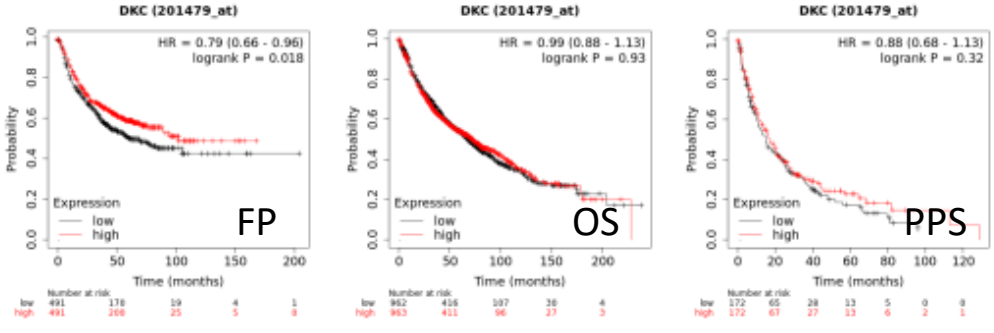

## D Ovarian Cancer

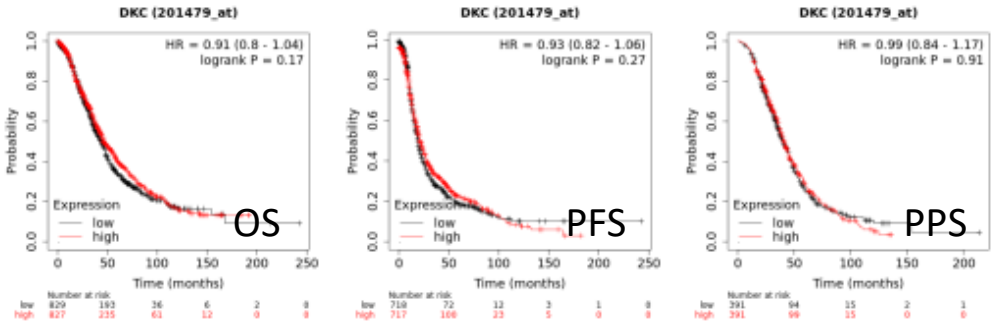

## E Breast Cancer

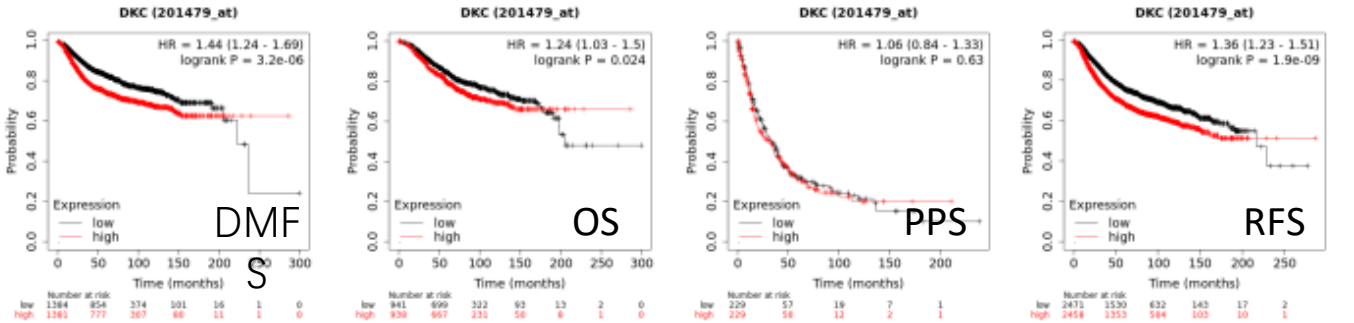

## A BRCA

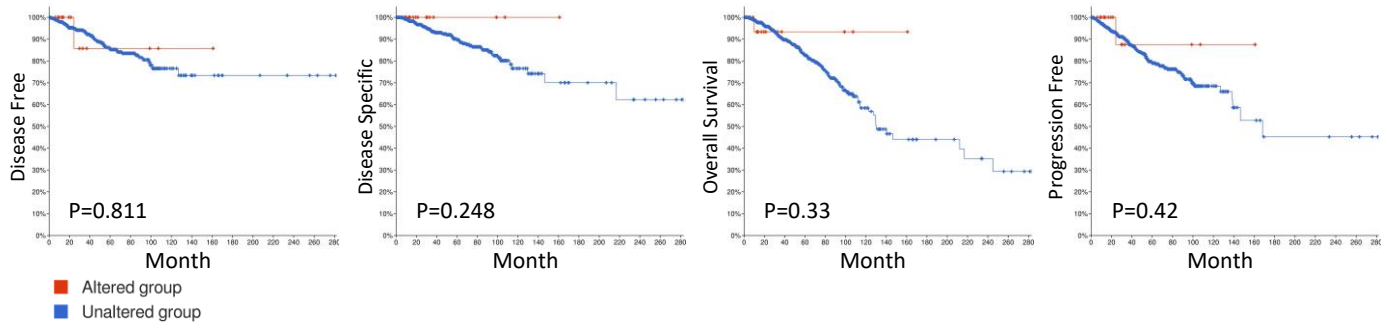

## B

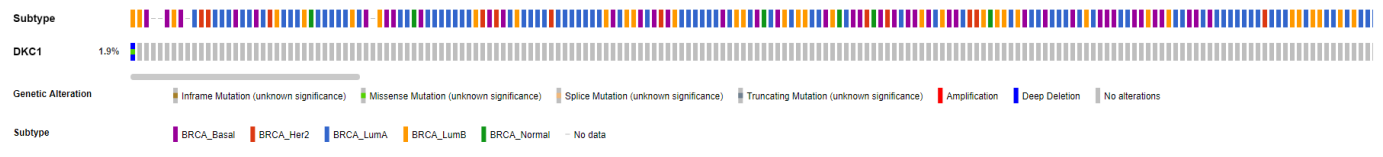

## C LUAD

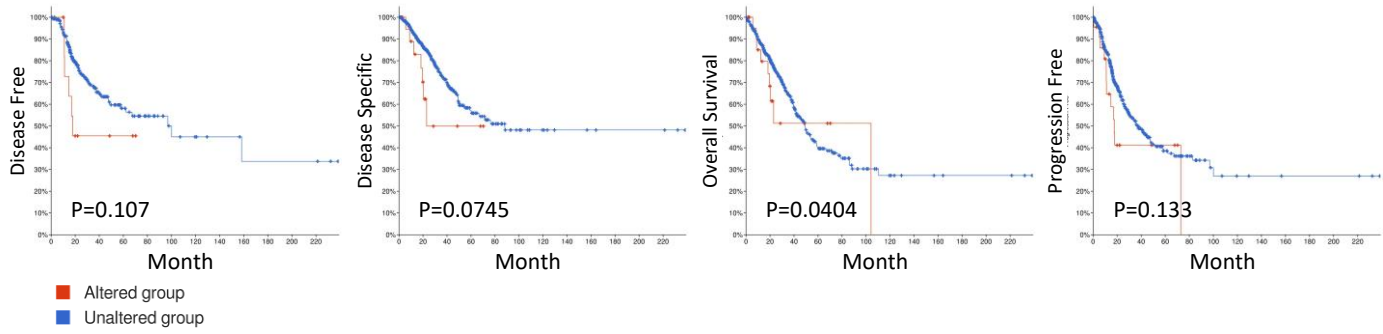

## D

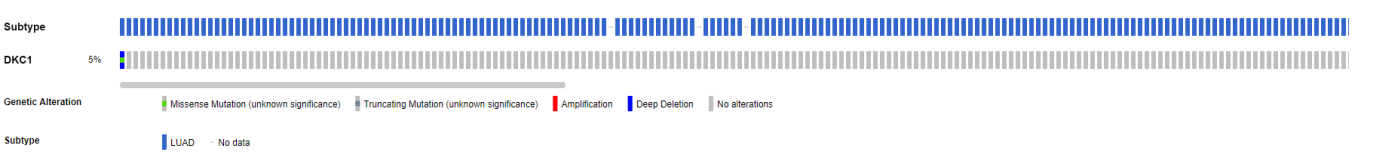

## E

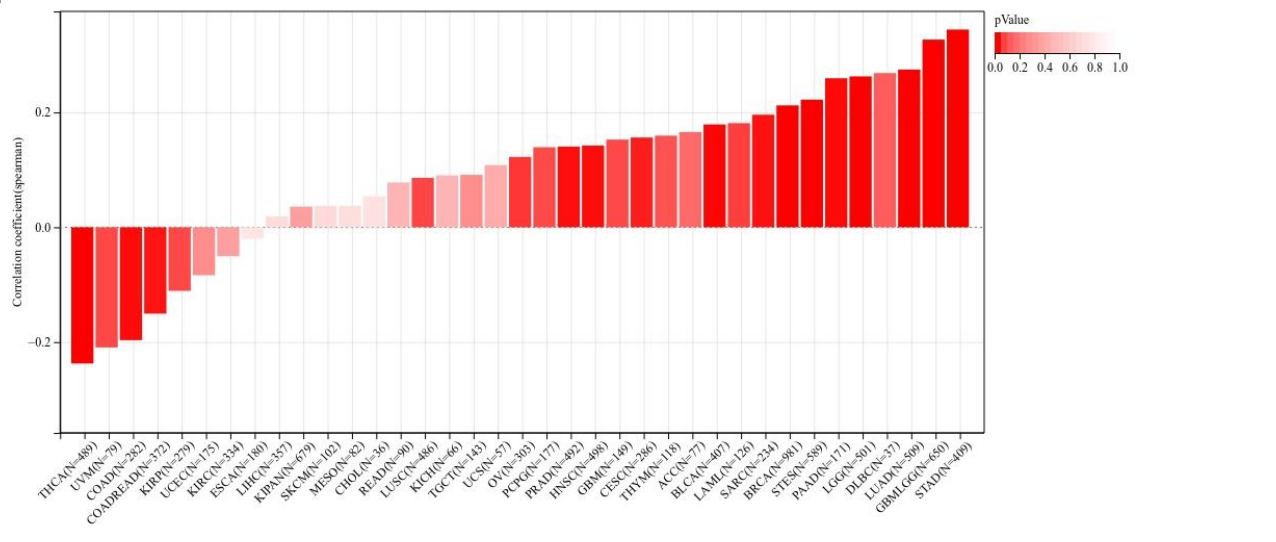

# S6

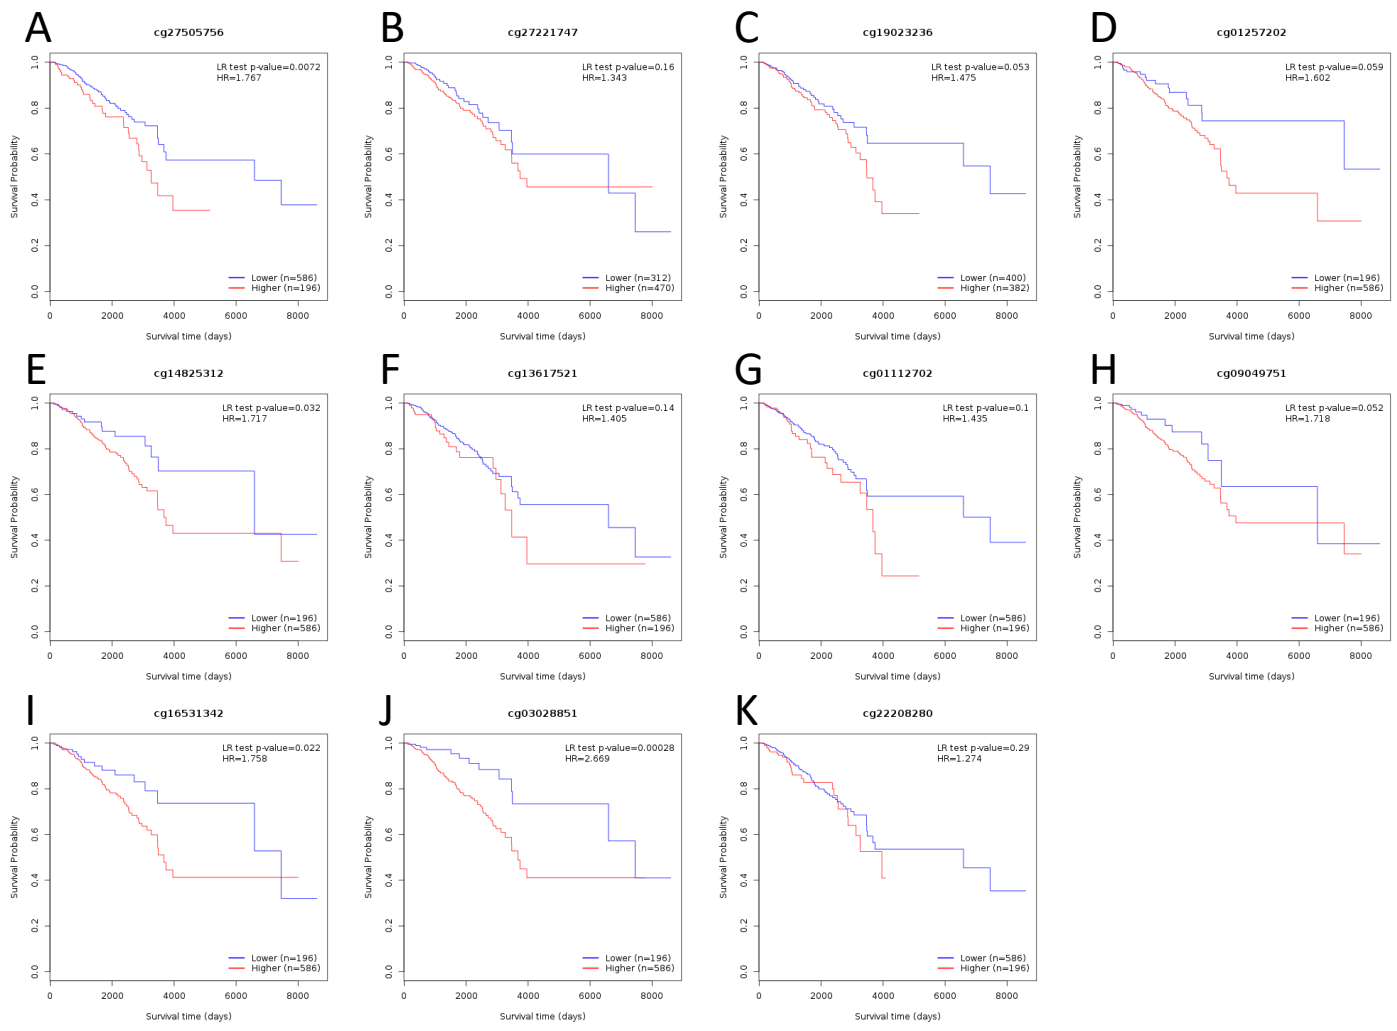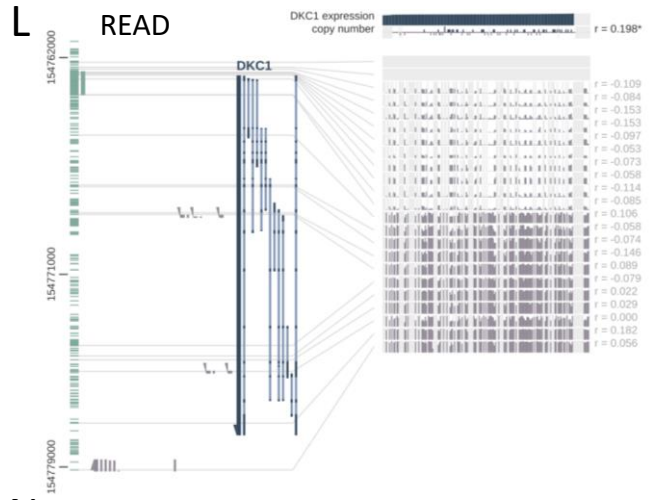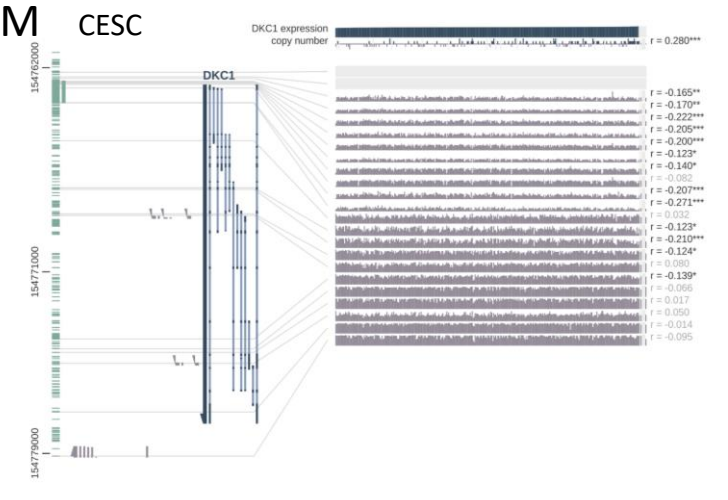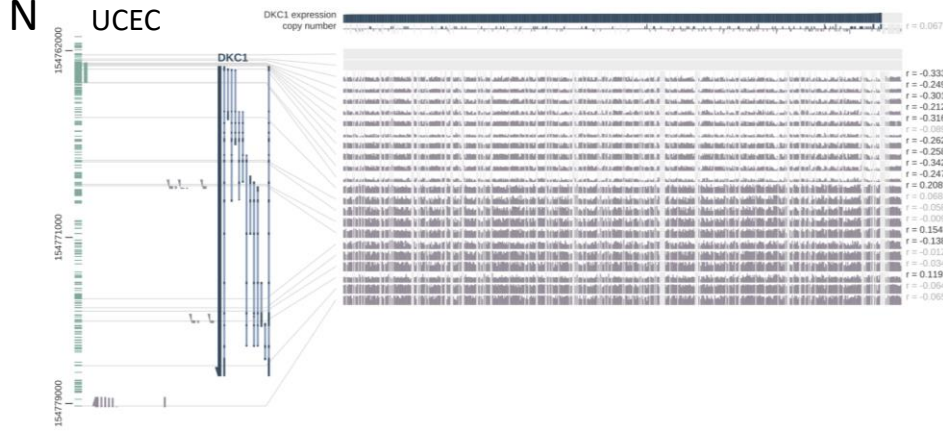

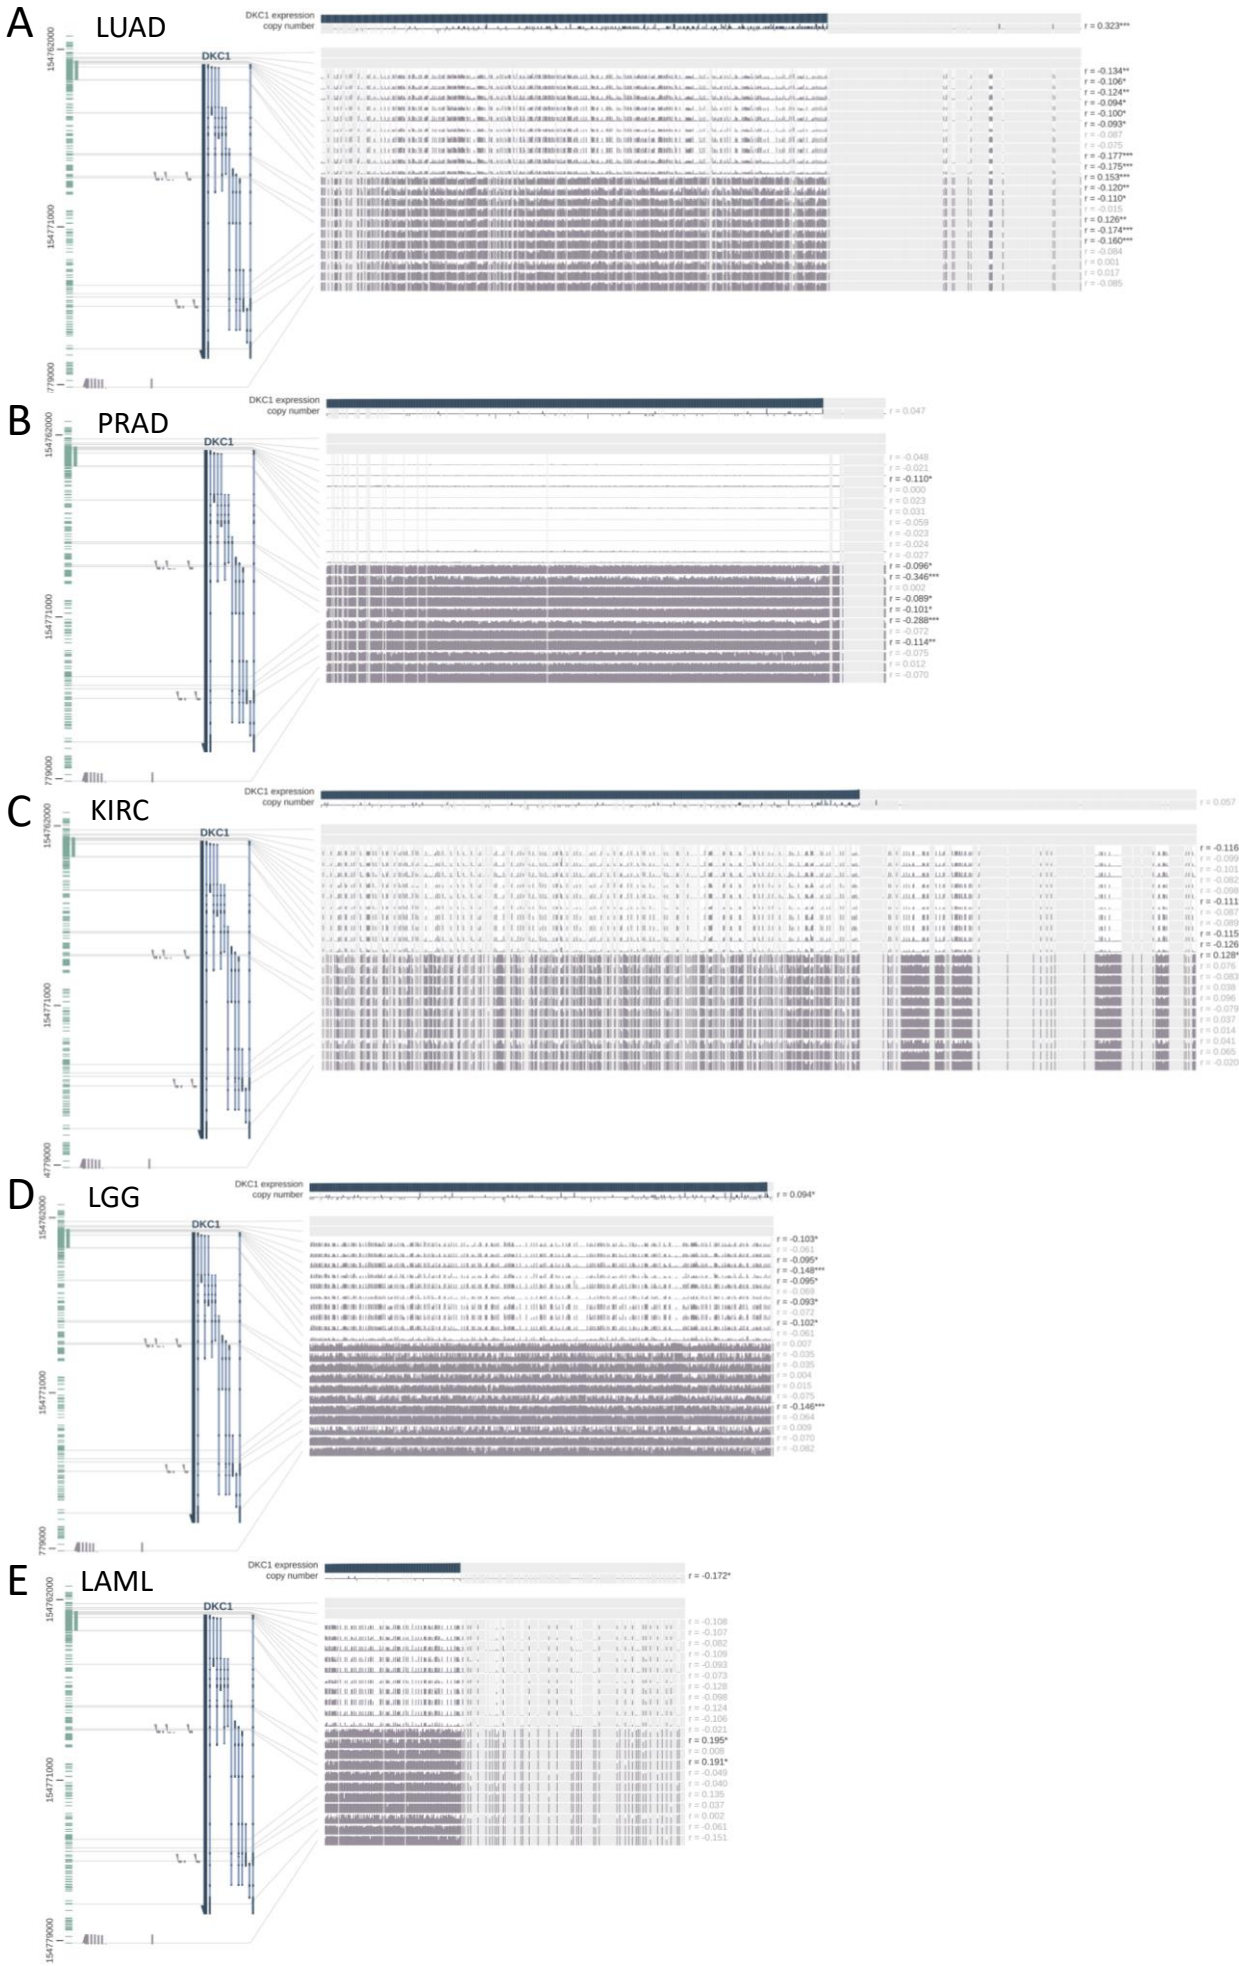

A

HNSC

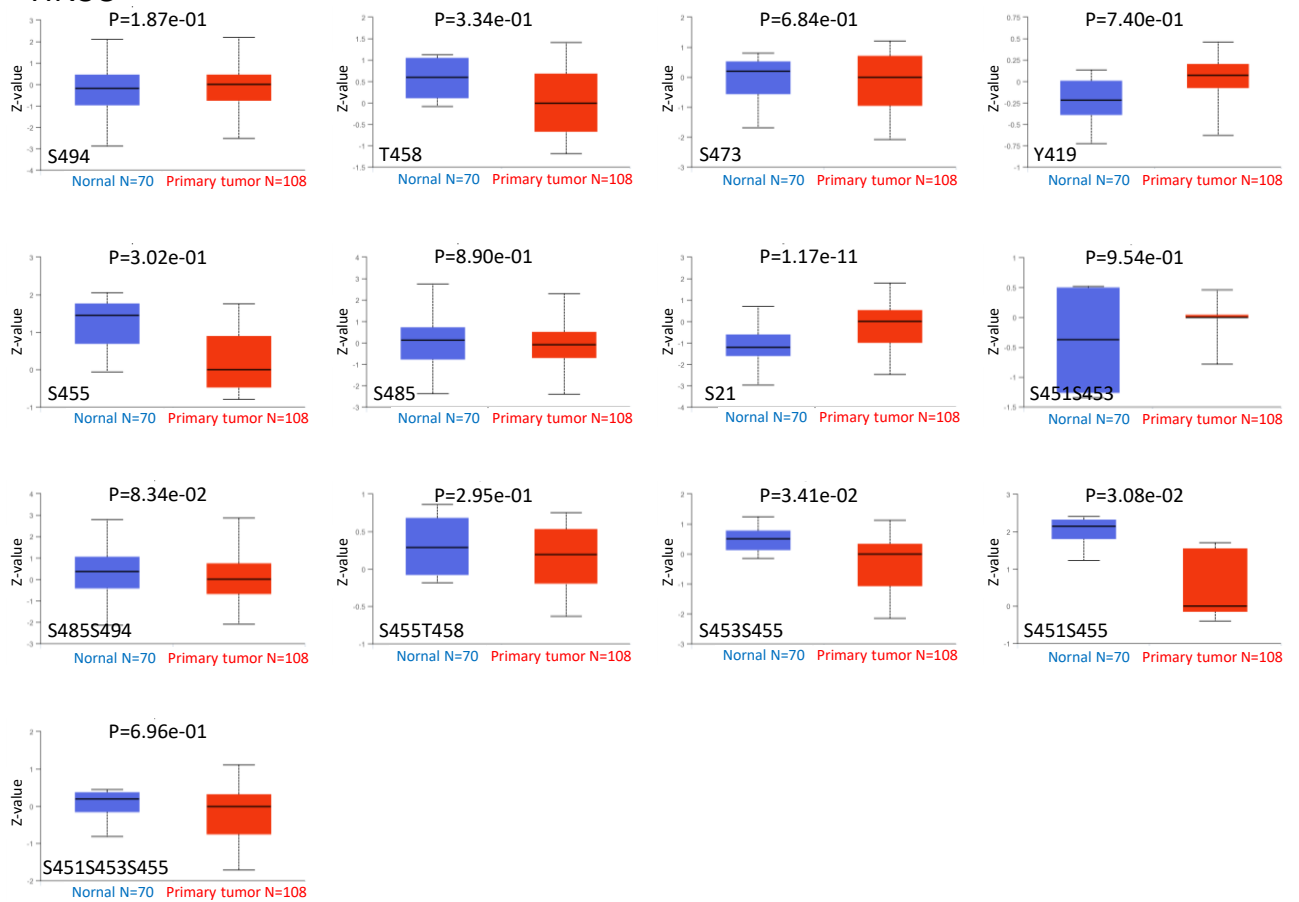

B

HCC

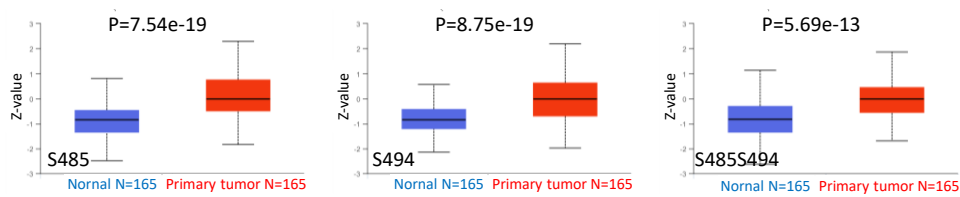

C

LUAD

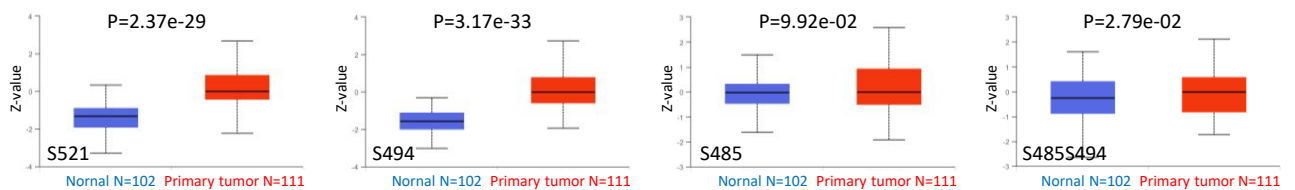

A

T cell CD8<sup>+</sup>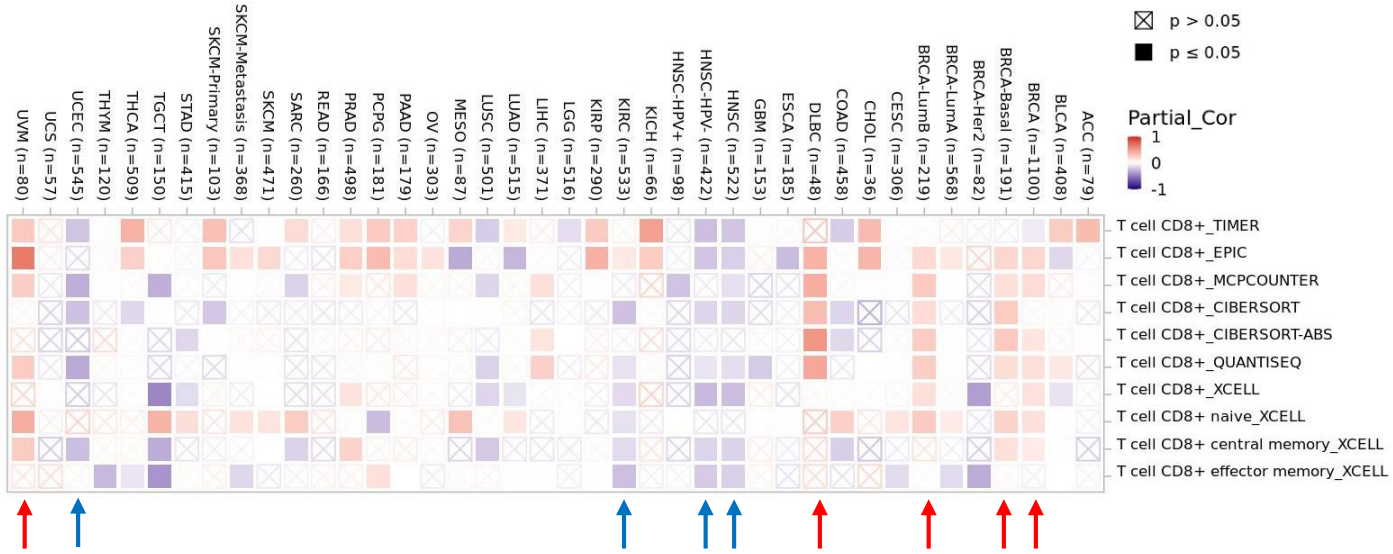

B

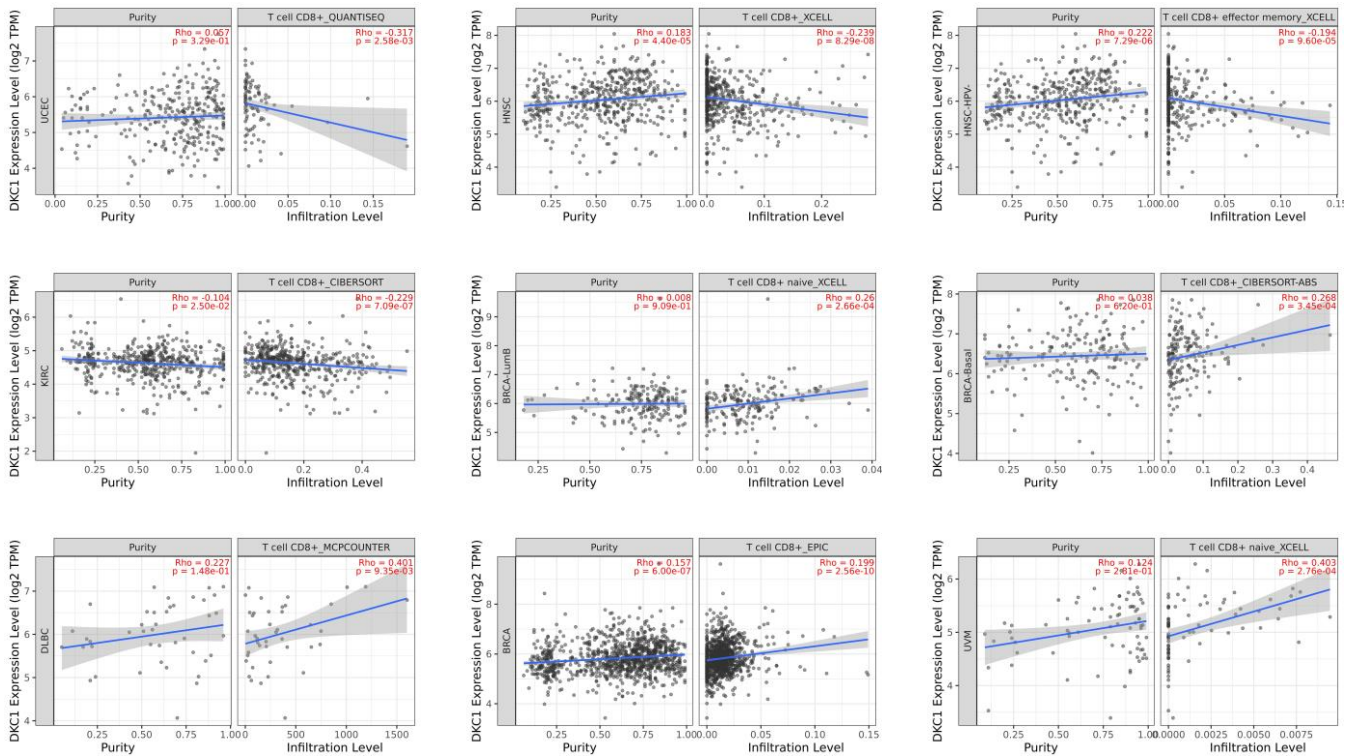

# S10

A

B cell

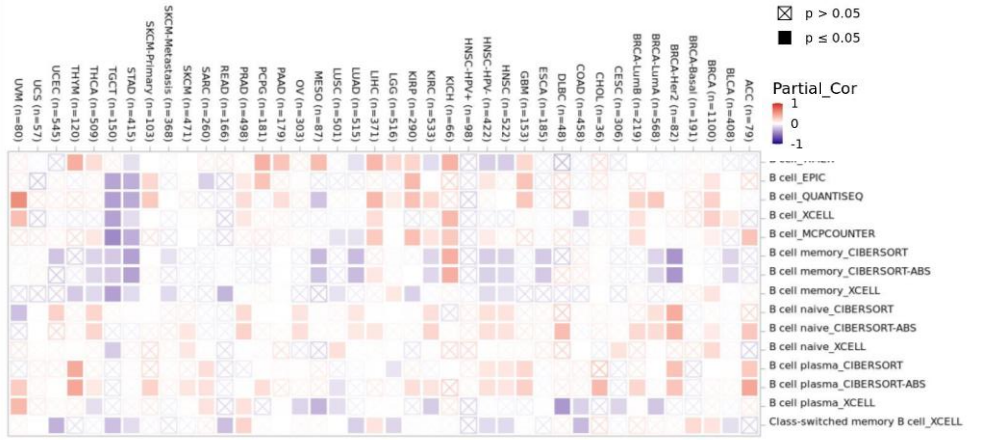

B

Mast cell

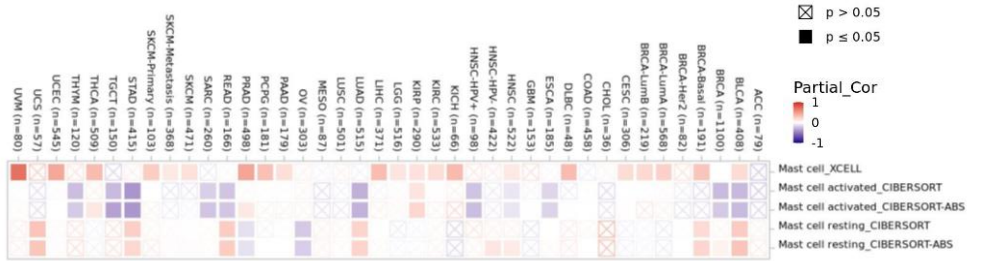

C

Monocyte

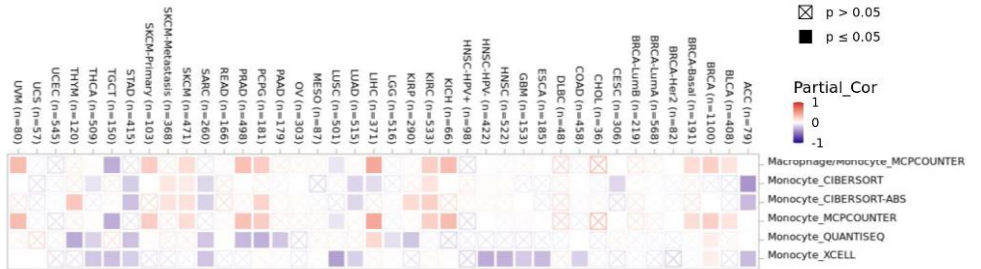

D

Neutrophil

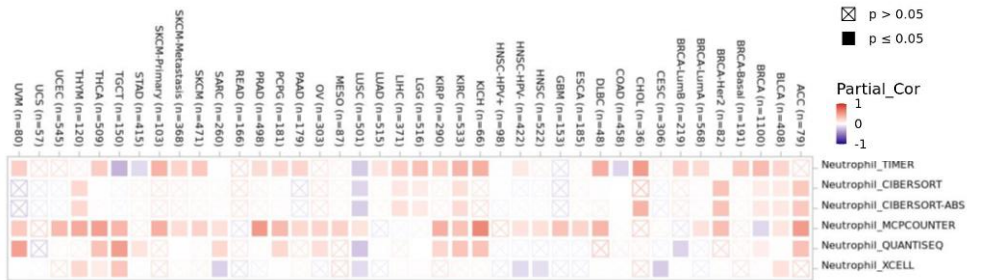



# S11

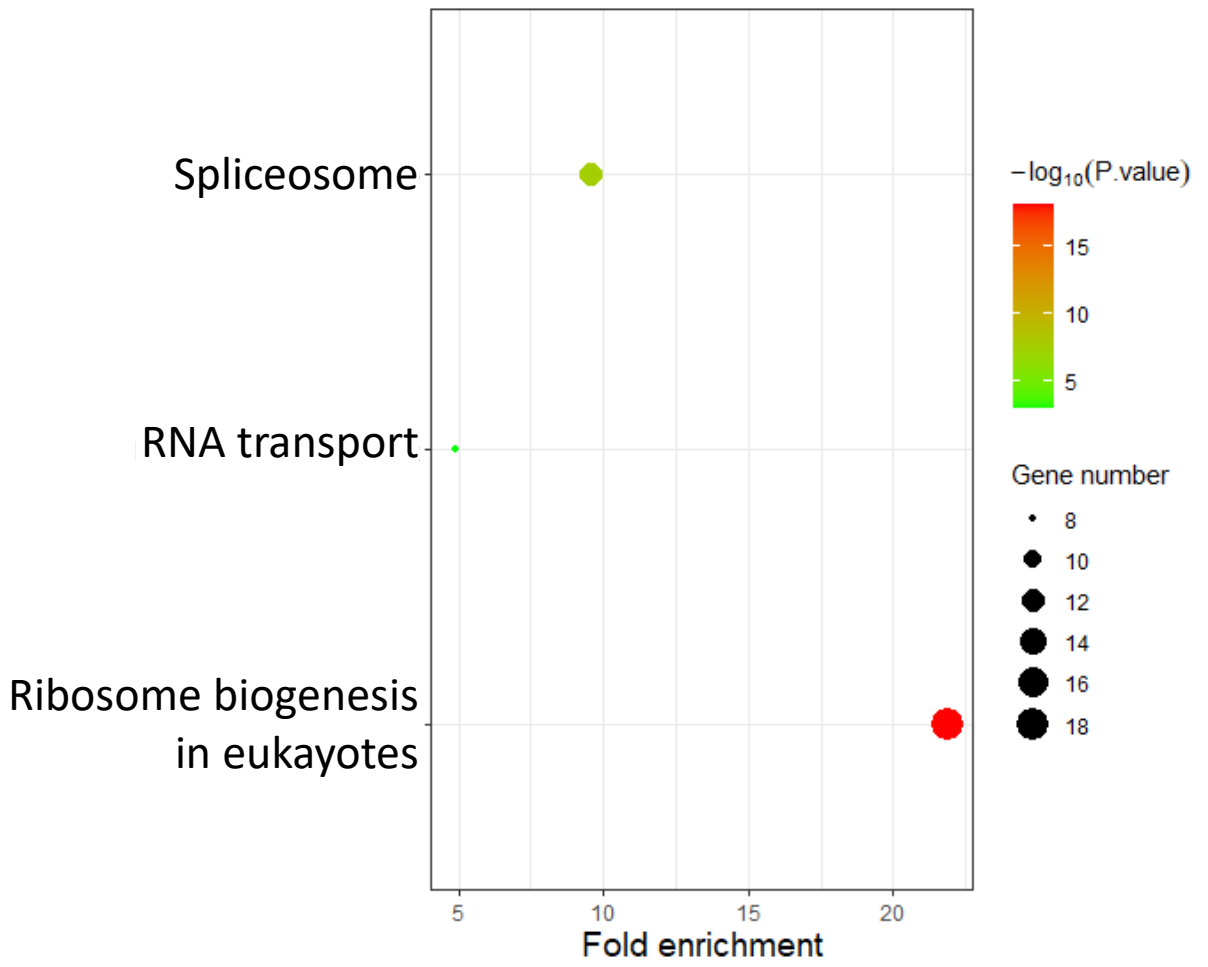

## Cellular component

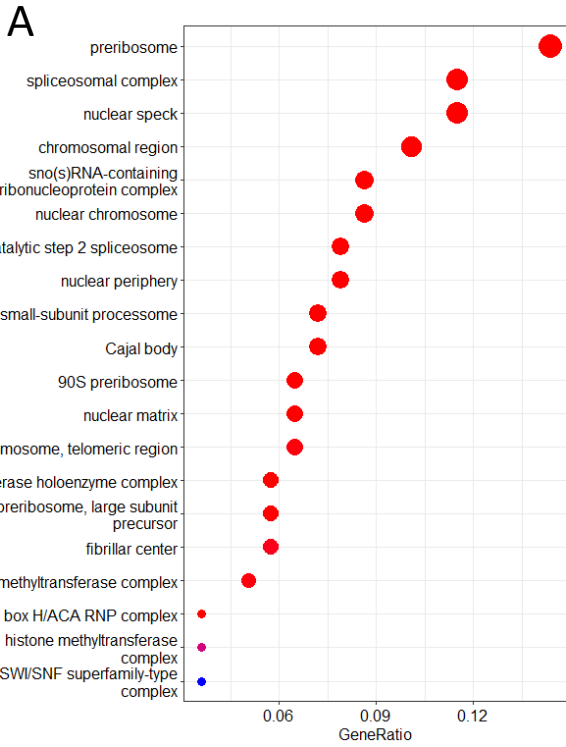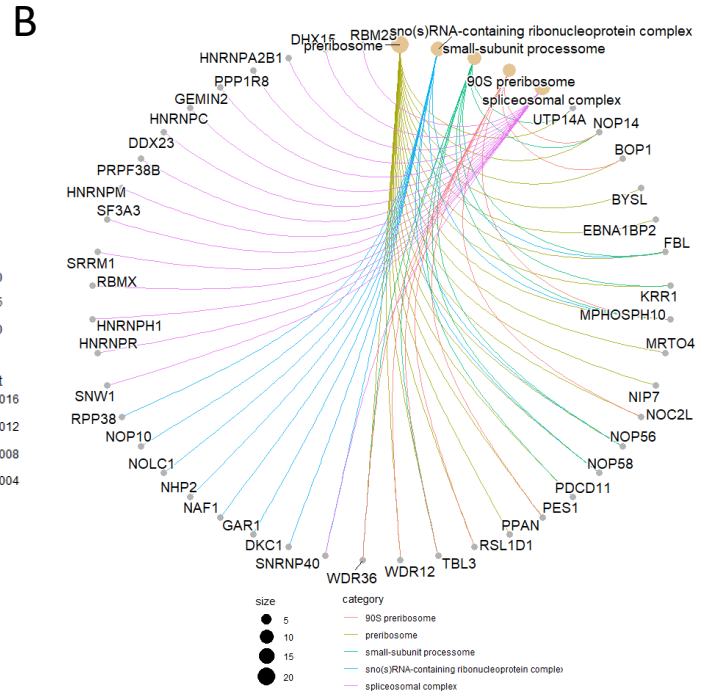

## Biological process

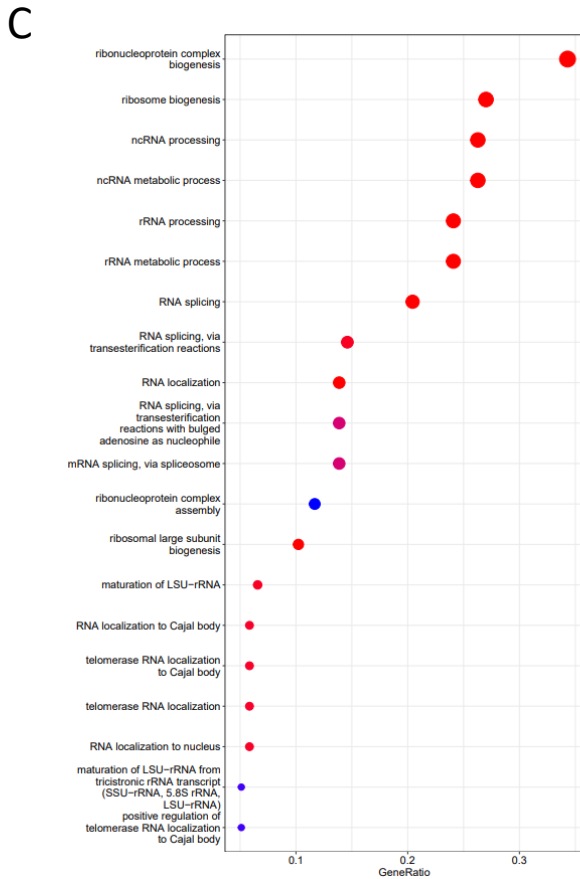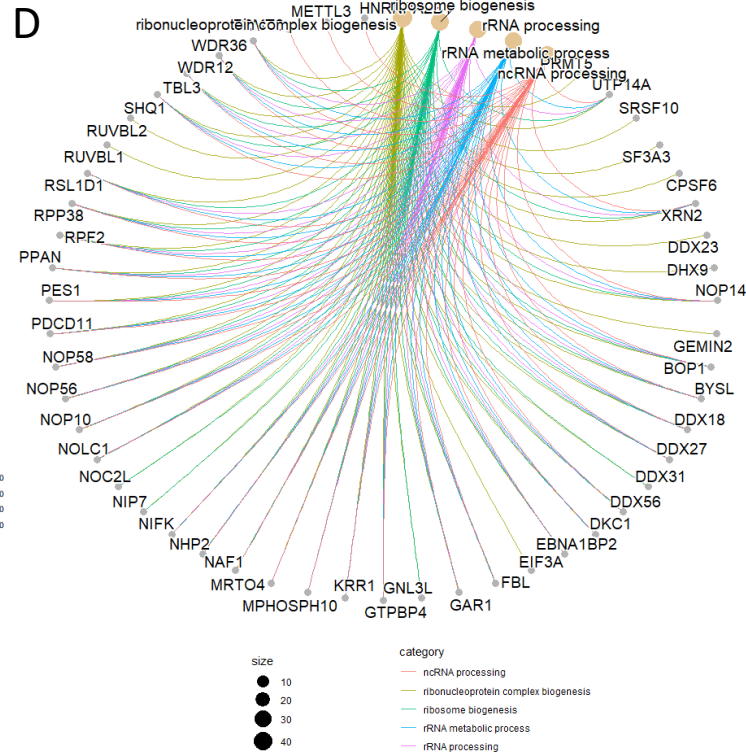

Supplement: MOESM1 [file 41065_2023_302_MOESM1_ESM.pdf]
