# Supplementary material for: A pan-cancer analysis of Dyskeratosis congenita 1 (DKC1) as a prognostic biomarker
Source: Springer Nature journal article supplement (doi:10.1186/s41065-023-00302-y), 2023-12-11
Supplement: MOESM2 [file 41065_2023_302_MOESM2_ESM.pdf]

## Abbreviation

|       |                                                                  |
|-------|------------------------------------------------------------------|
| ACC:  | Adrenocortical carcinoma                                         |
| BLCA: | Bladder urothelial carcinoma                                     |
| BRCA: | Breast invasive carcinoma                                        |
| ccRCC | Clear Cell Renal Cell Carcinoma                                  |
| CESC: | Cervical squamous cell carcinoma and endocervical adenocarcinoma |
| CHOL: | Cholangiocarcinoma                                               |
| COAD: | Colon adenocarcinoma                                             |
| DLBC: | Lymphoid neoplasm diffuse large B-cell lymphoma                  |
| ESCA: | Esophageal carcinoma                                             |
| GBM:  | Glioblastoma multiforme                                          |
| HNSC: | Head and neck squamous cell carcinoma                            |
| KICH: | Kidney chromophobe                                               |
| KIRC: | Kidney renal clear cell carcinoma                                |
| KIRP: | Kidney renal papillary cell carcinoma                            |
| LAML: | Acute myeloid leukemia                                           |
| LGG:  | Brain lower grade glioma                                         |
| LIHC: | Liver hepatocellular carcinoma                                   |
| LUAD: | Lung adenocarcinoma                                              |
| LUSC: | Lung squamous cell carcinoma                                     |
| MESO: | Mesothelioma                                                     |
| OV:   | Ovarian serous cystadenocarcinoma                                |
| PAAD: | Pancreatic adenocarcinoma                                        |
| PCPG: | Pheochromocytoma and paraganglioma                               |
| PRAD: | Prostate adenocarcinoma                                          |
| READ: | Rectum adenocarcinoma                                            |
| SARC: | Sarcoma                                                          |
| SKCM: | Skin cutaneous melanoma                                          |
| STAD: | Stomach adenocarcinoma                                           |
| TGCT: | Testicular germ cell tumors                                      |
| THCA: | Thyroid carcinoma                                                |
| THYM: | Thymoma                                                          |
| UCEC: | Uterine corpus endometrial carcinoma                             |
| UCS:  | Uterine carcinosarcoma                                           |
| UVM:  | Uveal melanoma                                                   |
| OS:   | Overall survival                                                 |
| DMFS: | Distant metastasis-free survival                                 |
| RFS:  | Relapse-free survival                                            |

PPS: Post-progression survival  
FP: First progression  
DFS: Disease-free survival  
DSS: Disease-specific survival  
PFS: Progression-free survival.

## Public Database Website

|                   |                                                                                                                 |
|-------------------|-----------------------------------------------------------------------------------------------------------------|
| TIMER2.0          | <a href="http://timer.cistrome.org">http://timer.cistrome.org</a>                                               |
| GEPIA2            | <a href="http://gepia2.cancer-pku.cn">http://gepia2.cancer-pku.cn</a>                                           |
| CPTAC             | <a href="http://www.cbioportal.org">http://www.cbioportal.org</a>                                               |
| MEXPRESS          | <a href="https://mexpress.be">https://mexpress.be</a>                                                           |
| MethSurv          | <a href="https://biit.cs.ut.ee/methsurv/#tab-2291-1">https://biit.cs.ut.ee/methsurv/#tab-2291-1</a>             |
| PhosphoNET        | <a href="http://www.phosphonet.ca">http://www.phosphonet.ca</a>                                                 |
| STRING            | <a href="https://cn.string-db.org">https://cn.string-db.org</a>                                                 |
| Venn Diagram tool | <a href="http://bioinformatics.psb.ugent.be/webtools/Venn">http://bioinformatics.psb.ugent.be/webtools/Venn</a> |

## Code for KEGG analysis

```
rm(list=ls())
library(Cairo)
library(stringr)
library(ggplot2)

pathway=read.table("6-5kegg pathway.txt",header = T,sep="\t")
pathway$Term<-str_split_fixed(pathway@Term,":",2)[,2]
ggplot(pathway,aes(x=Fold.Enrichment,y=Term))+
  geom_point(aes(size=Count,color=-1*log10(PValue)))+
  scale_color_gradient(low="green",high="red")+
  labs(
    color=expression(-log[10](P.value)),
    size="Gene number",
    x="Fold enrichment"
  )+
  theme_bw()+
  theme(
    axis.text.y = element_text(size=rel(1.3)),
    axis.title.x = element_text(size=rel(1.3)),
    axis.title.y = element_blank()
  )
)
```

## **Code for snetplots and cnetplots of GO enrichment analysis**

```
rm(list=ls())
library(biomaRt)
library(clusterProfiler)
library(org.Hs.eg.db)
library(enrichplot)
library(data.table)

genelist_input <- fread(file="GENE.txt",header = T, sep = '\t', data.table = F)
genename <- as.character(genelist_input[,1])

GO_result_MF <- enrichGO(genename, 'org.Hs.eg.db', ont="MF", keyType = "SYMBOL")
dotplot(GO_result_MF,showCategory = 20)

cnetplot(GO_result_MF,colorEdge = TRUE,node_label = "all",circular = TRUE,showCategory =
5)
```
